# Supplementary material for: Kinetic Characterisation of a Single Chain Antibody against the Hormone Abscisic Acid: Comparison with Its Parental Monoclonal
Source: PubMed Central journal article supplement (PMC4811560; doi:10.1371/journal.pone.0152148), 2016-03-29
Supplement: pone.0152148.s001.pdf [file pone.0152148.s001.pdf]

## Supplementary data and figures

**Additional methods:** Details of primers and PCR conditions.

Polymerase chain reaction (PCR)

When the PCR products were intended for cloning or sequencing, proof-reading DNA polymerase PfuUltra™ Hotstart High-Fidelity DNA Polymerase (Stratagene) or Pwo DNA polymerase (Roche) was used. For other applications, standard Taq DNA polymerase (Roche). A typical PCR reaction contained 200 μM of each dNTP, 300 nM of each primer, 1 ng template plasmid DNA, 1X PCR buffer with 2 mM MgSO<sub>4</sub>, 2.5 U of DNA polymerase and sterile double distilled water to 50 μl. The reaction mixtures were incubated for 5 min at 94°C to denature DNA and then 25 cycles of the following: 94°C for 1 min, 50-65°C for 1 min for annealing, and 72°C for 1 min for extension. Upon completion the reaction was held at 72°C for 7min. The annealing temperature depended on the melting temperatures of the primers used. PCR products were analysed by agarose gel electrophoresis.

Primer list:

Primers were designed and analysed using PrimerSelect DNASTar (DNASTar Inc, Madison, USA) or Vector NTI 9 (Invitrogen) software. Primers were obtained from MWG Biotech or Invitrogen.

|                                  |                                                                                    |
|----------------------------------|------------------------------------------------------------------------------------|
| Anti ABA-scFv forward            | 5'-TCAGAATTCCAGGTTTCAGCAGCAGTC-3'                                                  |
| Anti ABA-scFv reverse            | 5'-TGCTAAGCTTACGCCGCACGTTTCAGTT-3'                                                 |
| Sense aABA scFv 6His             | 5'-CAATAACAACAACCTCGGGATCGAG-3'                                                    |
| Antisense aABA scFv 6His         | 5'-CTAATGAAGCTTAATGATGATGATGATGAT<br>GCGCCGCACGTTTCAGTTCCA-3'                      |
| pMal pIII sec primer             | 5'-CACTTCACCAACAAGGACCA-3'                                                         |
| Sense BAP EcoRI for pMal c2x     | 5'-GGAGCAGGCGAATTCGTGAGCAAG<br>GGCGAGGAGCTGTTACCGGG-3'                             |
| Antisense BAP EcoRI for pMal c2x | 5'-GGAGCTGCAAGCTTTTACTCGTGCC<br>ACTCGATCTTCTGGGCCTCGAAGATGTCGTT<br>CAGGCCGCCCGG-3' |

PCR products were purified using QIAquick PCR purification kit (Qiagen) according to the manufacturers' instructions.
