# Supplementary material for: Kinetic Characterisation of a Single Chain Antibody against the Hormone Abscisic Acid: Comparison with Its Parental Monoclonal
Source: PubMed Central journal article supplement (PMC4811560; doi:10.1371/journal.pone.0152148), 2016-03-29
Supplement: pone.0152148.s003.pdf [file pone.0152148.s003.pdf]

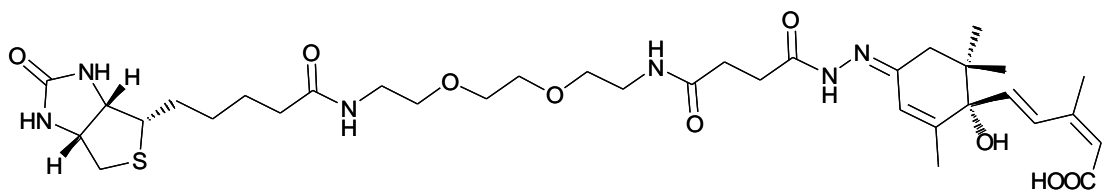

**Figure S2. Biotinylated ABA conjugate, b-PEG-ABA.** *S*-(+)-abscisic acid 4'-(*N*-succinamidyl acyl hydrazide-*N'*-biotinyl-3,6-dioxaoctane-1,8 diamine). Enantiopure (+)-ABA was conjugated to biotin through C-4' via a 15-atom PEG linker (**b-PEG-ABA**).
