# Supplementary material for: Kinetic Characterisation of a Single Chain Antibody against the Hormone Abscisic Acid: Comparison with Its Parental Monoclonal
Source: PubMed Central journal article supplement (PMC4811560; doi:10.1371/journal.pone.0152148), 2016-03-29
Supplement: pone.0152148.s005.pdf [file pone.0152148.s005.pdf]

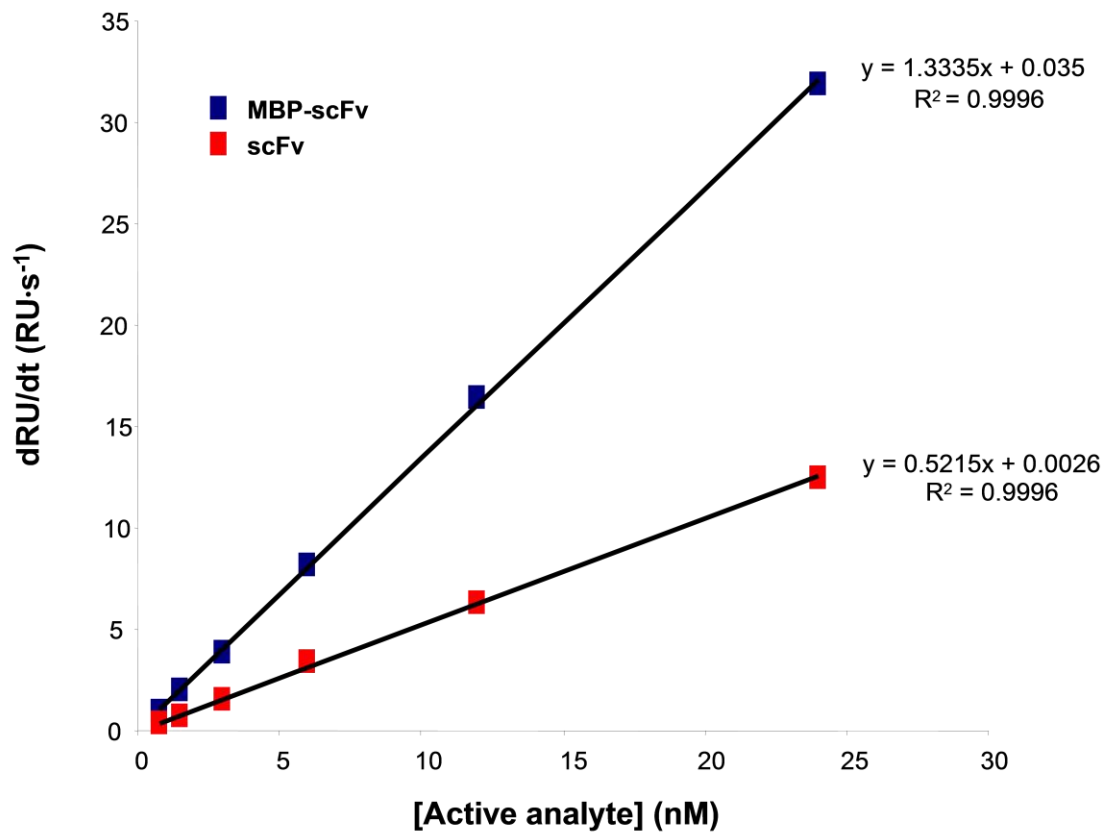

**Figure S4. Calibration curve for active protein concentration (Kazemier method).** Active protein concentration standards were injected over the surface of a sensor chip saturated with ligand (b-PEG-ABA) and the initial association rate in a 5 s window, 10 s after the start of the injection, was plotted against concentration and fitted to a linear function.
