# Supplementary material for: Kinetic Characterisation of a Single Chain Antibody against the Hormone Abscisic Acid: Comparison with Its Parental Monoclonal
Source: PubMed Central journal article supplement (PMC4811560; doi:10.1371/journal.pone.0152148), 2016-03-29
Supplement: pone.0152148.s010.pdf [file pone.0152148.s010.pdf]

**Table S1.**

**Yields from expression and purification of anti-ABA scFv in *E. coli*.** The best scFv yields were found to be from Origami B cells, grown prior to induction in 100 mM glucose at 37 °C to  $A_{600}$  of approximately 0.5, followed by slow induction with 20 $\mu$ M IPTG in the presence of 0.4 M sucrose, for 16 hours at 18 °C,. The yield from the periplasm (pMal-c2x) or cytoplasm (cpMal-c2x) after affinity purification is given per litre of culture.

| <b>Fusion protein</b> | <b>Expression vector</b> | <b>Host cell strain</b> | <b>Affinity column</b> | <b>Yield of purified protein (mg·L<sup>-1</sup>)</b> |
|-----------------------|--------------------------|-------------------------|------------------------|------------------------------------------------------|
| MBP-scFv              | pMal-p2x                 | Rosetta-gami B          | Amylose                | 0.5                                                  |
|                       | pMal-c2x                 | Origami B               | Amylose                | 21.6                                                 |
|                       | pMal-c2x                 | BL21                    | Amylose                | 3.12                                                 |
