# Supplementary material for: Kinetic Characterisation of a Single Chain Antibody against the Hormone Abscisic Acid: Comparison with Its Parental Monoclonal
Source: PubMed Central journal article supplement (PMC4811560; doi:10.1371/journal.pone.0152148), 2016-03-29
Supplement: pone.0152148.s011.pdf [file pone.0152148.s011.pdf]

**Table S2**  
**Determination of the concentration of active MBP-antiABA-scFv.**

| Response interval                                                                                                                                                 | Flow rate<br>( $\mu\text{l}\cdot\text{min}^{-1}$ ) | $L_m \times 10^{-5}$<br>( $\text{m}\cdot\text{s}^{-1}$ ) | $dR/dt_{\text{reg}}$<br>( $\text{RU}\cdot\text{s}^{-1}$ ) | $\chi^2_{\text{reg}}$ | $dR/dt_{\text{fit}}$<br>( $\text{RU}\cdot\text{s}^{-1}$ ) | MTL  |
|-------------------------------------------------------------------------------------------------------------------------------------------------------------------|----------------------------------------------------|----------------------------------------------------------|-----------------------------------------------------------|-----------------------|-----------------------------------------------------------|------|
| <b>I: 100-200 RU</b><br><br>[A <sub>bulk</sub> ]=32.098 nM<br>L <sub>r</sub> =1.307x10 <sup>-5</sup> m·s <sup>-1</sup><br>χ <sup>2</sup> <sub>fit</sub> =0.0048   | 2                                                  | 0.32                                                     | 7.53                                                      | 0.10                  | 7.48                                                      | 0.80 |
|                                                                                                                                                                   | 5                                                  | 0.43                                                     | 9.53                                                      | 0.04                  | 9.63                                                      | 0.75 |
|                                                                                                                                                                   | 10                                                 | 0.54                                                     | 11.5                                                      | 0.04                  | 11.44                                                     | 0.70 |
|                                                                                                                                                                   | 25                                                 | 0.73                                                     | 14.02                                                     | 0.01                  | 14.03                                                     | 0.64 |
|                                                                                                                                                                   | 50                                                 | 0.90                                                     | 16.08                                                     | 0.00                  | 16.08                                                     | 0.58 |
|                                                                                                                                                                   | 100                                                | 1.1                                                      | 17.3                                                      | 0.01                  | 17.28                                                     | 0.54 |
| <b>II: 200-300 RU</b><br><br>[A <sub>bulk</sub> ]=30.759 nM<br>L <sub>r</sub> =1.290x10 <sup>-5</sup> m·s <sup>-1</sup><br>χ <sup>2</sup> <sub>fit</sub> =0.0065  | 2                                                  | 0.32                                                     | 7.23                                                      | 0.03                  | 7.13                                                      | 0.80 |
|                                                                                                                                                                   | 5                                                  | 0.43                                                     | 9.23                                                      | 0.04                  | 9.27                                                      | 0.75 |
|                                                                                                                                                                   | 10                                                 | 0.54                                                     | 11.1                                                      | 0.04                  | 11.11                                                     | 0.71 |
|                                                                                                                                                                   | 25                                                 | 0.73                                                     | 13.75                                                     | 0.04                  | 13.78                                                     | 0.64 |
|                                                                                                                                                                   | 50                                                 | 0.90                                                     | 15.85                                                     | 0.08                  | 15.95                                                     | 0.58 |
|                                                                                                                                                                   | 100                                                | 1.1                                                      | 17.35                                                     | 0.09                  | 17.25                                                     | 0.55 |
| <b>III: 300-400 RU</b><br><br>[A <sub>bulk</sub> ]=30.791 nM<br>L <sub>r</sub> =1.1x10 <sup>-5</sup> m·s <sup>-1</sup><br>χ <sup>2</sup> <sub>fit</sub> =0.002    | 2                                                  | 0.32                                                     | 7.08                                                      | 0.02                  | 7.03                                                      | 0.78 |
|                                                                                                                                                                   | 5                                                  | 0.43                                                     | 9.02                                                      | 0.04                  | 9.06                                                      | 0.72 |
|                                                                                                                                                                   | 10                                                 | 0.54                                                     | 10.8                                                      | 0.03                  | 10.77                                                     | 0.67 |
|                                                                                                                                                                   | 25                                                 | 0.73                                                     | 13.21                                                     | 0.09                  | 13.21                                                     | 0.60 |
|                                                                                                                                                                   | 50                                                 | 0.90                                                     | 15.08                                                     | 0.06                  | 15.14                                                     | 0.54 |
|                                                                                                                                                                   | 100                                                | 1.1                                                      | 16.31                                                     | 0.08                  | 16.27                                                     | 0.51 |
| <b>IV: 400-500 RU</b><br><br>[A <sub>bulk</sub> ]=30.849 nM<br>L <sub>r</sub> =1.00x10 <sup>-5</sup> m·s <sup>-1</sup><br>χ <sup>2</sup> <sub>fit</sub> =0.002    | 2                                                  | 0.32                                                     | 6.9                                                       | 0.04                  | 6.87                                                      | 0.76 |
|                                                                                                                                                                   | 5                                                  | 0.43                                                     | 8.74                                                      | 0.04                  | 8.79                                                      | 0.70 |
|                                                                                                                                                                   | 10                                                 | 0.54                                                     | 10.39                                                     | 0.01                  | 10.39                                                     | 0.65 |
|                                                                                                                                                                   | 25                                                 | 0.73                                                     | 12.7                                                      | 0.07                  | 12.65                                                     | 0.58 |
|                                                                                                                                                                   | 50                                                 | 0.90                                                     | 14.37                                                     | 0.13                  | 14.41                                                     | 0.52 |
|                                                                                                                                                                   | 100                                                | 1.1                                                      | 15.41                                                     | 0.21                  | 15.43                                                     | 0.49 |
| <b>V: 500-600 RU</b><br><br>[A <sub>bulk</sub> ]=30.692 nM<br>L <sub>r</sub> =0.846x10 <sup>-5</sup> m·s <sup>-1</sup><br>χ <sup>2</sup> <sub>fit</sub> =0.0145   | 2                                                  | 0.32                                                     | 6.97                                                      | 0.07                  | 6.77                                                      | 0.73 |
|                                                                                                                                                                   | 5                                                  | 0.43                                                     | 8.43                                                      | 0.04                  | 8.57                                                      | 0.65 |
|                                                                                                                                                                   | 10                                                 | 0.54                                                     | 9.98                                                      | 0.07                  | 10.03                                                     | 0.60 |
|                                                                                                                                                                   | 25                                                 | 0.73                                                     | 12                                                        | 0.04                  | 12.04                                                     | 0.53 |
|                                                                                                                                                                   | 50                                                 | 0.90                                                     | 13.56                                                     | 0.06                  | 13.56                                                     | 0.46 |
|                                                                                                                                                                   | 100                                                | 1.1                                                      | 14.5                                                      | 0.07                  | 14.43                                                     | 0.41 |
| <b>VI: 600-700 RU</b><br><br>[A <sub>bulk</sub> ]=30.622 nM<br>L <sub>r</sub> =0.7815x10 <sup>-5</sup> m·s <sup>-1</sup><br>χ <sup>2</sup> <sub>fit</sub> =0.0037 | 2                                                  | 0.32                                                     | 6.58                                                      | 0.09                  | 6.51                                                      | 0.71 |
|                                                                                                                                                                   | 5                                                  | 0.43                                                     | 8.11                                                      | 0.11                  | 8.19                                                      | 0.66 |
|                                                                                                                                                                   | 10                                                 | 0.54                                                     | 9.52                                                      | 0.07                  | 9.54                                                      | 0.61 |
|                                                                                                                                                                   | 25                                                 | 0.73                                                     | 11.41                                                     | 0.04                  | 11.38                                                     | 0.54 |
|                                                                                                                                                                   | 50                                                 | 0.90                                                     | 12.81                                                     | 0.15                  | 12.76                                                     | 0.48 |
|                                                                                                                                                                   | 100                                                | 1.1                                                      | 13.49                                                     | 0.11                  | 13.54                                                     | 0.45 |

The slopes of sensorgram curves ( $dR/dt_{\text{reg}}$ ) at different flow rates were determined by linear regression in each chosen response interval (I-VI). The  $\chi^2_{\text{reg}}$  values correspond to the fit of the linear regression. The mass transport coefficient ( $L_m$ ) was calculated according to equation 1. The concentration of MBP-antiABA-scFv ( $[A_{\text{bulk}}]$ ) and the coefficient of reaction flux ( $L_r$ ) were determined by globally fitting the data obtained at different flow rates to equation 2, using  $dR/dt_{\text{reg}}$  as slopes for each response interval. Ideal slopes ( $dR/dt_{\text{fit}}$ ) were obtained by introducing the calculated  $L_m$ ,  $L_r$  and

$A_{\text{bulk}}$  values into equation 2. The measured concentration of *active* MBP-antiABA-scFv, calculated as the average of  $[A_{\text{bulk}}]$  from each response interval, is  $30.97 \pm 0.559$  nM, which corresponds to 21.8% activity of the total purified protein in the sample (determined by measuring the optical density at 280 nm). The diffusion coefficient for MBP-antiABA-scFv was calculated to be  $5 \times 10^{-11} \text{ m}^2 \cdot \text{s}^{-1}$ . The concentrations of MBP-antiABA-scFv determined by measuring the UV absorbance at 280 nm was  $142 \text{ nM} / 10.6 \mu\text{g} \cdot \text{ml}^{-1}$ .
